# Supplementary material
Source: ML conference proceedings conference paper supplement (https://openreview.net/forum?id=5iXG6EgByK)
Supplement: supplementary_material [file attachment]

# Promptable Closed-loop Traffic Simulation Supplementary Material

Anonymous Author(s)

Affiliation

Address

email

## A Demo Video

In our submitted supplementary video, we include the rollout videos of all the rollout outputs of ProSim in the main paper. We highly recommend interested readers to go through the video demos to observe the promptable and closed-loop properties of ProSim.

## B ProSim

### B.1 Encoder: Position-aware Attention Details

To model relationships between scene tokens and aggregate features, we pass  $F_{ma}^0$  through multiple Transformer layers. In most existing methods, each layer follows  $F_{ma}^l = \text{MHSA}(F_{ma}^{l-1})$ , where MHSA denotes multi-head self-attention and  $l$  is the layer index. However, since each token in  $F_{ma}^0$  is normalized to its local coordinate system, basic MHSA cannot infer the relative positional relationship between tokens. Instead, we explicitly model the relative positions between tokens with a position-aware attention mechanism. For scene token  $i$ , we compute its relative positional relationship with scene token  $j$  with:

$$p_{ma[i,j]} = \text{Rot}(p_{ma[j]} - p_{ma[i]}, -h_{ma[i]}), \quad h_{ma[i,j]} = h_{ma[j]} - h_{ma[i]}, \quad (1)$$

where  $p_{ma[i,j]} \in \mathbb{R}^2$  and  $h_{ma[i,j]} \in \mathbb{R}$  are the relative position and heading of token  $j$  in token  $i$ 's coordinate system,  $\text{Rot}(\cdot)$  is the vector rotation function. We denote this paired relative position as  $r_{ma[i,j]} = [p_{ma[i,j]}, h_{ma[i,j]}]$ . Then, we perform position-aware attention for token  $i$  with:

$$\begin{aligned} f_{ma[i]}^l &= \text{MHSA}(\mathbf{Q} : [f_{ma[i]}^{l-1}, \text{PE}(r_{ma[i,i]})]), \\ \mathbf{K} &: \{[f_{ma[j]}^{l-1}, \text{PE}(r_{ma[i,j]})]\}_{j \in \Omega(i)}, \\ \mathbf{V} &: \{[f_{ma[j]}^{l-1} + \text{PE}(r_{ma[i,j]})]\}_{j \in \Omega(i)}, \end{aligned} \quad (2)$$

where PE denotes positional encoding and  $\Omega(i)$  is the scene token index of the neighboring tokens of  $i$ . In our experiments, we set  $\Omega(i)$  to contain the nearest 32 tokens of  $i$  according to their positions. Note that the above result remains the same regardless of which global coordinate system we use for the scene input  $\sigma = (M, A)$ . With this formulation, we model the relative position relationship between different scene tokens symmetrically. At each layer, we apply Equation 2 to all scene tokens in parallel. We denote this position-aware attention module as:

$$F_{ma}^l = \text{MHSA}'(F_{ma}^{l-1}, P_{ma}, H_{ma}) \quad (3)$$

Note that this position-aware modification can be similarly applied to multi-headed cross-attention MHCA', which we will use later in the Generator and Policy modules. Finally, we obtain the last-layer token features as scene tokens  $F = [F_m, F_a]$ .

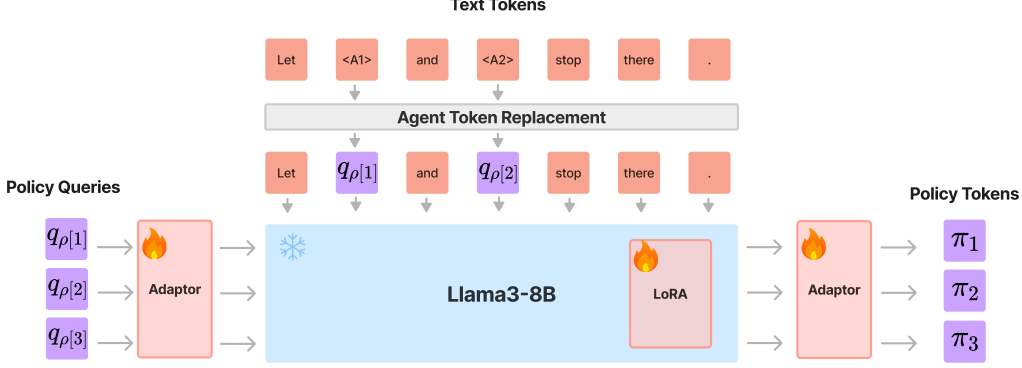

Figure A1: Language condition encoder for Generator.

## 26 B.2 Generator: Language Prompting Details

27 For each scene, we have an optional user-input text prompt  $L$  that contains multiple sentences that  
 28 could describe agent behaviors, interactions and scenario properties. To make it easy to refer to  
 29 different agents in the scene, we ask the user to use a specific format " $\langle A[i] \rangle$ " when mentioning the  
 30  $i$ -th agent. For example, to instruct agent  $a_1$  to stop, the user would say "let  $\langle A1 \rangle$  stop".

31 To process the scene-level text prompt  $L$  and condition all the agents, we use an LLM to comprehend  
 32 the natural language prompt and policy features, and generate language-conditioned policy features  
 33 for all agents. To do this, we use a LLaMA3-8B model finetuned with LoRA as backbone, as well  
 34 as two adaptors to bridge the latent spaces of LLM and policy tokens. We show an overview of our  
 35 model in Figure A1.

36 Specifically, we use a two-layer MLP adaptor to convert all the policy features to in the LLM's  
 37 feature space  $\{t_{a[1]}, \dots, t_{a[N]}\} = \text{MLP}(\{q_{\rho[1]}, \dots, q_{\rho[N]}\})$ . This operation enables the LLM to take  
 38 and comprehend agent policy features in the text space. Next, we use LLM's text tokenizer and  
 39 input embedding to obtain text tokens from the natural language prompt  $L \{t_{L[1]}, \dots, t_{L[O]}\}$ , where  
 40  $O$  is the number of text tokens in  $L$ .

41 Note that some tokens of  $L$  specifically mentions indexed agents (e.g., " $\langle A1 \rangle$ "). To help LLM un-  
 42 derstanding the correspondence between agent reference and their policy tokens, we directly replace  
 43 these reference text tokens with agent policy tokens. Specifically, for an agent-reference text token  
 44  $t_{L[j]}$ , we replace it with the corresponding agent policy token  $t_{L[j]} \leftarrow t_{a[i]}$  given  $t_{L[j]}$  corresponds  
 45 to " $\langle A[i] \rangle$ ". To make sure each " $\langle A[i] \rangle$ " is tokenized to a single token, we add them as new tokens  
 46 to the text tokenizer. We call this step "Agent Token Replacement" in Figure A1.

47 After getting all the text and agent token features, we concatenate them to create the complete input  
 48 sequence  $\{t_{L[1]}, \dots, t_{L[O]}, t_{a[1]}, \dots, t_{a[N]}\}$  and feed it to the LLM. We then extract the hidden features  
 49 for the last  $N$  tokens from the last LLM layer  $\{t'_{a[1]}, \dots, t'_{a[N]}\}$ , which contains text-contextualized  
 50 policy features for each agent. Next, we use an MLP adaptor to convert these features back to get  
 51 the text-conditional policy features  $\{q_{L[1]}, \dots, q_{L[N]}\} = \text{MLP}(\{t'_{a[1]}, \dots, t'_{a[N]}\})$ .

52 Finally, for each agent, we obtain its policy token  $\pi_i$  by adding the prompt and text conditional  
 53 policy tokens together,  $\pi_i = q_{\rho[i]} + q_{L[i]}$ .

## 54 B.3 Training

55 **LLM Pretraining.** As described above, we train the LLM in Generator with LoRA to compre-  
 56 hend and generate policy token features. However, we found that directly training the LLM with  
 57 the closed-loop imitation loss leads to inferior text-prompting performance. We conjecture this is  
 58 because at the early training stage the LLM is not prepared to interact with the policy tokens. Mean-  
 59 while, the rollout loss can be decently optimized without using the LLM's output, giving little signal  
 60 for LLM to learn.

To deal with this issue, we propose to pretrain the LLM to have the capacity to interact with policy token features. To this end, we first train a ProSim model without using text prompts and the LLM with the rollout loss  $\mathcal{L}$ . Next, we add a simple MLP layer after the Generator to predict the goal point of each agent given its policy token  $\pi$ . We supervise this task with an MSE loss  $\mathcal{L}_{\text{goal}}$  using GT goal points. This task is much simpler than the full task while enforces the LLM to interact with policy tokens. To pretrain the LLM, we fix all other modules and only train the LLM and this new MLP with  $\mathcal{L}_{\text{goal}}$ . Here we only use text as the prompt in inputs. After pretraining, the LLM learns to predict the goal intention of each agent from text prompt and add that information to  $\pi$ , making it already useful for the Policy. Finally, we discard the goal-prediction MLP and train the full ProSim module with all types of prompts and the complete loss  $\mathcal{L}$ . In our experiments, we pretrain the LLM on ProSim-Instruct-520k for 5 epoches before using it in the full Generator module.

**Collision loss.** For collision loss  $\mathcal{L}_{\text{coll}}$ , we aim to compute the overlapping area between each pair of agent using their bounding boxes through the full rollout trajectory. To this end, at each timestep, for each agent we compute their occupation polygon using their size, position and heading at this timestep. Then, we measure the overlapping area of each agent polygon pair by computing the signed distance between these polygons, where positive distance indicate no collision while negative distance collision indicate a collision. Specifically, we compute the signed distance between polygons A and B with the distance between the origin point and the Minkowski sum  $A + (-B)$ . For all the signed distance, we compute the loss value by first setting the positive distance to 0 (no collision), and then taking the negative of the rest of signed distances to penalize collisions. We compute the average over all agents through all timesteps to obtain the final  $\mathcal{L}_{\text{coll}}$ . We implement this loss function by referring to the Waymo Open Sim Agent Challenge [collision metric](#).

**Offroad loss.** For offroad loss  $\mathcal{L}_{\text{off}}$ , we aim to compute the overlapping area of each agent and the offroad areas through the full rollout trajectory. To this end, we use the similar strategy as in the collision loss. Specifically, at each timestep we obtain all the agent polygons in the same way as in the collision loss. Then, we compute the signed distance between the four corners of each polygons to a densely sampled set of road edges. Similarly, positive distance indicate no offroad while negative distance indicate being offroad. Finally, We average over all negative distances for all agents through all timesteps to obtain the final offroad loss. We implement this loss function by referring to the Waymo Open Sim Agent Challenge [offroad metric](#).

## C ProSim-Instruct-520k

### C.1 Route Sketch Labeling Details

Compared with the real trajectory, points in the route sketch are sparse, noisy, and incomplete. We simulate these effects with the following steps. First, we extract each agent’s complete trajectory from  $\tau$ . Then, we process this point set by 1) uniformly subsampling the points for sparsity; 2) adding random noise to each point; 3) randomly sampling a consecutive subset. For each agent, its route sketch is a set of ordered 2D points representing sketch points on the map. The number of points in route sketch could be different across agents. In our experiment, we use a uniform subsample rate of 5. We then add random noise with standard variation of 0.1 meter. Finally, we ensure the randomly sampled consecutive subset contains at least 5 points.

### C.2 Action Tag Labeling Details

For each action type, we carefully design a heuristic function that takes an agent’s trajectory  $s_{t_1:t_2}$  from step  $t_1$  to  $t_2$ , and outputs a binary label whether  $s_{t_1:t_2}$  satisfies the condition of this action. Then, we can run this function across the full rollout with sliding window and temporal aggregation to obtain the full duration  $[t_s, t_e]$  that this motion tag is valid. For each agent, we run all the motion tags with this method we obtain a set of motion tags. Finally, we post-process the labels to remove

107 conflicting motion tags and temporal noises. Please refer to our codebase for the heuristic function  
108 implementation details upon release.

### 109 C.3 Natural Language Labeling Details

110 For each scenario, we provide the LLM model with agent properties (name and type) as well as all  
111 of their agent tags (action type and duration). We then prompt LLM to output 20 different sentences,  
112 each describing the agent behavior or scenario properties in natural language. To obtain interesting  
113 and diverse language description of the scenario, in the system prompt we instruct the LLM to 1)  
114 describe temporal transition of agent behavior (e.g., "Let <A1> change to the left lane and then  
115 make a left turn."); 2) describe scenario properties (e.g., "This is a busy scene with most agents  
116 accelerating"); 3) describe relationships of different agents (e.g., "Let <A1>, <A2>, <A3> keep  
117 their own lanes simultaneously"). We concatenate these sentences together to form the prompt  $L$  for  
118 each scenario.

119 Here we show full prompt we used for the LLM labeling:

#### Prompt 1: Full prompt for LLM labeling

```
120 Example input:
121 Vehicle Agents:
122   ['<ego>', '<71f1c>', '<df6a1>', '<dad99>']
123 Pedestrian Agents:
124   ['<a261a>', '<191e8>']
125 Motorcycle Agents:
126   ['<d3ddc>', '<8cc93>', '<73c13>', '<d6a9e>']
127
128 Agent to Agent:
129   ParallelDriving - Agent (Left):<d6a9e>, Agent (Right):<dad99>, Start:50, End:80
130   ByPassingRight - Agent (Right, Faster, Overtaking):<ego>, Agent (Left, Slower, Overtaken
131   ):<dad99>, Start:30, End:65
132
133 Agent Behavior:
134   Decelerate - Agent:<d3ddc>, Start:0, End:5
135   Decelerate - Agent:<ego>, Start:30, End:55
136   Decelerate - Agent:<dad99>, Start:35, End:45
137   Decelerate - Agent:<d6a9e>, Start:45, End:80
138   KeepLane - Agent:<d3ddc>, Start:0, End:60
139   KeepLane - Agent:<dad99>, Start:30, End:80
140   KeepLane - Agent:<d6a9e>, Start:40, End:80
141   KeepSpeed - Agent:<191e8>, Start:0, End:20
142   KeepSpeed - Agent:<ego>, Start:0, End:30
143   KeepSpeed - Agent:<d6a9e>, Start:40, End:45
144   Parked - Agent:<a261a>, Start:0, End:25
145   Parked - Agent:<df6a1>, Start:0, End:80
146   RightLaneChange - Agent:<ego>, Start:0, End:15
147   Straight - Agent:<191e8>, Start:0, End:20
148   Straight - Agent:<d3ddc>, Start:0, End:70
149   Straight - Agent:<ego>, Start:0, End:80
150   Straight - Agent:<dad99>, Start:30, End:80
151   Straight - Agent:<d6a9e>, Start:40, End:80
152   Stopping - Agent:<d3ddc>, Start:5, End:70
153   Stopping - Agent:<dad99>, Start:45, End:80
154   LeftLaneChange - Agent:<ego>, Start:15, End:65
155
156 Example output:
157
158 Here are the 20 commands for the simulation:
159   "<ego> bypasses <dad99> from the right lane side when <dad99> is driving slower and
160   finally stopping."
161   "Do right lane change <ego> at the start of the simulation."
162   "Motorcycle <d3ddc> decelerates early on."
163   "After finishing the initial maneuver, redirect <ego> to occupy the left lane."
164   "Make <dad99> and <d6a9e> to drive parallel, with <d6a9e> on the left."
165   "<ego> slows down following the sequence of lane changes.."
```

```

167 "All vehicles, except for <ego>, <dad99>, and <d6a9e>, remain parked."
168 "Let <ego> maintain a steady speed after decelerating."
169 "Command <d3ddc> cyclist to come to a complete stop after its initial slowdown."
170 "Instruct <dad99> to decelerate and then stop towards the end of the scenario."
171 "Keep <d6a9e> in its lane after it finishes driving parallel."
172 "Walking person <191e8> should keep a steady pace before stopping."
173 "<d3ddc> resumes moving straight after stopping."
174 "Keep all parked vehicles stationary to represent a low-activity scene."
175 "Direct <dad99> car to travel straight for an extended period after decelerating."
176 "Ensure <ego> car moves straight throughout the simulation."
177 "After slowing, instruct <d6a9e> to continue on a direct trajectory."
178 "Let the pedestrian <a261a> standstill in the scene."
179 "Emphasize the limited activity within the scene, highlighting agents either stopping or
180 staying within their lanes."
181 "Pedestrian <191e8> walks straight."

```

183 We also show two LLM output examples for two scenarios:

#### Prompt 2: Text prompt labeling example 1

```

184 Here are the 20 commands for the simulation:
185
186
187 1. "Have <43> accelerate and make a left turn throughout the entire simulation."
188 2. "Initially, <58> accelerates, but then slows down and comes to a stop."
189 3. "Keep <10> moving straight while it decelerates early on."
190 4. "Make <48> decelerate and then turn left towards the middle of the simulation."
191 5. "Command <39> to accelerate and drive straight after 40 seconds."
192 6. "Make <7> accelerate rapidly towards the end of the simulation."
193 7. "<ego> remains parked and stationary throughout the entire scenario."
194 8. "Direct <11> to stay parked for the entire duration of the simulation."
195 9. "Most vehicles, except for a few, are parked and stationary at the start of the
196 simulation."
197 10. "After 40 seconds, <14> starts moving after being parked initially."
198 11. "Make <4> change direction with a right turn after being parked for a while."
199 12. "Let <48> decelerate and come to a stop before making a left turn."
200 13. "Have <58> accelerate initially, but then slow down and stop."
201 14. "Command <45> and <56> to stop after 40 seconds."
202 15. "Instruct <32> to stop after 15 seconds and then stay stationary."
203 16. "Make <15> stop and stay stationary throughout the entire simulation."
204 17. "Have <50>, <52>, and <58> accelerate and drive straight throughout the simulation."
205 18. "Keep <24> moving straight after 65 seconds."
206 19. "Make <39> accelerate and drive straight after being parked initially."
207 20. "Emphasize the dynamic nature of the scene, with agents accelerating, decelerating, and
208 changing directions."

```

#### Prompt 3: Text prompt labeling example 2

```

210 Here are the 20 commands for the simulation:
211
212
213 1. "<653> accelerates while making a left turn throughout the entire simulation."
214 2. "Have <654> maintain a steady acceleration from start to finish."
215 3. "<661> gradually slows down and drives straight throughout the scenario."
216 4. "<666> decelerates and moves straight without any turns or stops."
217 5. "Keep <1465> cycling in a straight line for the entire 8 seconds."
218 6. "Make <651> drive straight without any changes in speed or direction."
219 7. "Ensure <659>, <660>, <662>, <664>, and <ego> remain parked and stationary throughout the
220 simulation."
221 8. "After accelerating, have <653> continue moving in a straight line."
222 9. "Instruct <661> to decelerate and then maintain a steady speed."
223 10. "Make <654> overtake <661> from the left lane."
224 11. "<663> follows <661> at a steady pace, maintaining a safe distance."
225 12. "Command <653> to merge into the lane where <661> is driving."
226 13. "Direct <1465> to pass <651> on the right side."
227 14. "Have <661> change lanes to the left and then continue driving straight."
228 15. "Make <654> drive parallel to <653> on the right side."
229 16. "<ego> remains stationary, observing the surrounding traffic."

```

- 230 17. "After accelerating, have <653> change lanes to the right."
- 231 18. "Ensure <660> and <664> remain parked, blocking the left and right lanes respectively."
- 232 19. "Instruct <663> to decelerate and then stop behind <661>."
- 233 20. "The bicycle <1465> cycles past the parked vehicles, maintaining a steady pace."

#### 235 C.4 Metric Formulation

236 In our paper, we provide two metrics of promptable closed-loop traffic simulation to measure *realism*  
 237 and *controllability*. Here we link these metrics to the problem formulation in Section 3. Recall that  
 238 we formulate promptable closed-loop traffic simulation as

$$p(\mathbf{s}_{1:T}|\sigma, \rho) = \prod_{t=1}^T \prod_{i=1}^N p(s_t^i | \mathbf{s}_{1:t-1}, \sigma, \rho). \quad (4)$$

239 Given GT data  $(\tau, \sigma, \rho)$ , *realism* measures the probability of the real rollout under the model distri-  
 240 bution  $p(\tau|\sigma, \rho)$ . In our main paper, we implement this metric with  $\mathbf{ADE}(\hat{\tau}, \tau)$ .

241 On the other hand, *controllability* measures how well the model follows the prompt  $\rho$ . We quantify  
 242 this by comparing the model’s realism gain against the unconditional model rollout  $p(\tau|\sigma, \rho) -$   
 243  $p(\tau|\sigma)$ . In our main paper, we implement this metric with relative improvement (**% Gain**) in realism  
 244 of the model’s output with and without prompts. We compute % Gain by comparing rollout ADE  
 245 with and without prompt conditioning. :  $\% \text{ Gain} = \frac{\mathbf{ADE}(\bar{\tau}, \tau) - \mathbf{ADE}(\hat{\tau}, \tau)}{\mathbf{ADE}(\bar{\tau}, \tau)} \times 100\%$ .

#### 246 C.5 Quality Assurance

247 To ensure the prompts we generate faithfully reflect the agent behaviors in the scenario, we conduct  
 248 a careful quality assurance process with human effort. As Goal Point and Route Sketch are directly  
 249 modified from real trajectories, there is no need to check their accuracy. On the other hand, the  
 250 accuracy of Text is largely dependent on the accuracy of the Action Tag as it stems from Action  
 251 Tags of all agents in a scene. Therefore, we focus on checking the quality of Action Tag. For each  
 252 action types, we ask human labelers to manually check whether the labeled action tag is accurate  
 253 both semantically and temporally by viewing the rollout videos. At each round, we ask human  
 254 labelers to check 100 motion tag examples for each action type. If the qualification rate of a certain  
 255 action type is below 85%, we rewrite the heuristic function of this action type according to the  
 256 human feedback, relabel the motion tags of this type and ask for another round of human checking.  
 257 We continue this process until all the action types pass the quality threshold.

258 We show the interface we developed for human labelers in Figure A2. This interface allow human  
 259 labelers to go through and rewind the scenario easily with the interactive progress bar. For each  
 260 scenario with multiple action tags, the interface let the labeler to go through all the action tags all  
 261 together. This allows the human labeler to QA multiple motion tags of the same scenario very  
 262 efficiently. In average, we found human labelers take around 10 seconds to give the QA output for  
 263 each motion tag. Additionally, we ask human labelers to give a QA output for each tag, choosen  
 264 from Correct, Wrong Action, Wrong Time, Wrong Agent, and Need Attention (unsure or other  
 265 types). These different types of QA error tags provide us useful feedback to improve our heuristic  
 266 functions.

#### 267 D Additional experiment results

268 In our paper, we show benchmark results of 5 different prompt combinations. Aside from these  
 269 combinations shown in the paper, we also show the % Gain results of other prompt combinations in  
 270 Table A1. We can see from the Table A1 that ProSim achieves consistent gain with different kinds  
 271 of prompt modality combinations. These results show that ProSim allows users to freely combine  
 272 different prompt modalities with high controllability.

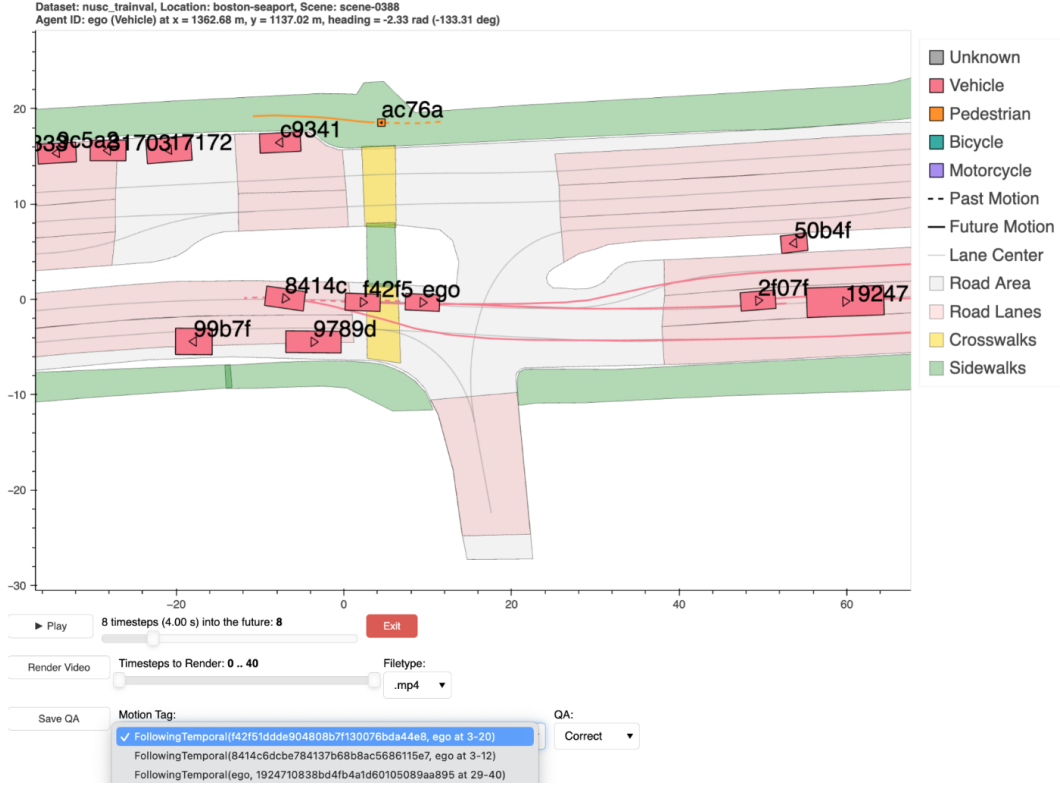

Figure A2: Interface used by human labeler for Quality Assurance.

| Metric | ADE ↓                  | Gain ↑ | ADE ↓                | Gain ↑ | ADE ↓                  | Gain ↑ | ADE ↓         | Gain ↑ |
|--------|------------------------|--------|----------------------|--------|------------------------|--------|---------------|--------|
| Prompt | Goal + Sketch          |        | Goal + Text          |        | Sketch + Action        |        | Sketch + Text |        |
| ProSim | 0.4845                 | 48.98% | 0.5983               | 37.00% | 0.5588                 | 41.16% | 0.5698        | 40.00% |
| Prompt | Goal + Action + Sketch |        | Goal + Action + Text |        | Text + Sketch + Action |        | All Types     |        |
| ProSim | 0.3635                 | 61.72% | 0.5663               | 40.37% | 0.5311                 | 44.08% | 0.2877        | 69.71% |

Table A1: Controllability evaluation of ProSim
